# Supplementary material
Source: PubMed Central journal article supplement (PMC6544545)
Supplement: EMS83095-supplement-Supplementary_Information.pdf [file EMS83095-supplement-Supplementary_Information.pdf]

1  
2  
3  
4  
5  
6  
7  
8  
9  
10  
11  
12  
13  
14  
15  
16  
17  
18  
19  
20  
21  
22  
23  
24  
25  
26  
27  
28  
29  
30

## Supplementary information

### Antibiotic-resistant bacteria show widespread collateral sensitivity to antimicrobial peptides

Viktória Lázár<sup>1,§</sup>, Ana Martins<sup>1,#</sup>, Réka Spohn<sup>1</sup>, Lejla Daruka<sup>1</sup>, Gábor Grézal<sup>1</sup>, Gergely Fekete<sup>1</sup>, Mónika Számel<sup>1</sup>, Pramod K Jangir<sup>1</sup>, Bálint Kintses<sup>1</sup>, Bálint Csörgő<sup>1</sup>, Ákos Nyerges<sup>1</sup>, Ádám Györkei<sup>1</sup>, András Kincses<sup>2</sup>, András Dér<sup>2</sup>, Fruzsina R Walter<sup>3</sup>, Mária A Deli<sup>3</sup>, Edit Urbán<sup>4</sup> Zsófia Hegedűs<sup>5</sup>, Gábor Olajos<sup>5</sup>, Orsolya Méhi<sup>1</sup>, Balázs Bálint<sup>6</sup>, István Nagy<sup>6,7</sup>, Tamás A Martinek<sup>5</sup>, Balázs Papp<sup>1,\*</sup>, Csaba Pál<sup>1,\*</sup>

<sup>1</sup>Synthetic and Systems Biology Unit, Institute of Biochemistry, Biological Research Centre, Hungarian Academy of Sciences, Szeged, Hungary

<sup>2</sup>Biomolecular Electronics Research Group, Bionanoscience Unit, Institute of Biophysics, Biological Research Centre, Hungarian Academy of Sciences, Szeged, Hungary

<sup>3</sup>Biological Barriers Research Group, Institute of Biophysics, Biological Research Centre, Hungarian Academy of Sciences, Szeged, Hungary

<sup>4</sup>Institute of Clinical Microbiology, Albert Szent-Györgyi Medical and Pharmaceutical Center, Faculty of Medicine, University of Szeged, Szeged, Hungary

<sup>5</sup>Institute of Pharmaceutical Analysis, University of Szeged, Szeged, Hungary

<sup>6</sup>SeqOmics Biotechnology Ltd., Mórahalom, Hungary

<sup>7</sup>Sequencing Platform, Institute of Biochemistry, Biological Research Centre of the Hungarian Academy of Sciences, Szeged, Hungary

<sup>§</sup>Current Affiliation: Faculty of Biology, Technion - Israel Institute of Technology, Haifa, Israel.

<sup>#</sup>The authors contributed equally to this work.

\*Correspondence should be sent to: Csaba Pál ([cpal@brc.hu](mailto:cpal@brc.hu)) or Balázs Papp ([pappb@brc.hu](mailto:pappb@brc.hu))

Synthetic and Systems Biology Unit, Institute of Biochemistry, Biological Research Centre, Temesvári krt 62, Szeged 6726,

Hungary. Tel.: +36 62 599 661; Fax: +36 62 433 506

## Table of contents

|    |                                                                                      |    |
|----|--------------------------------------------------------------------------------------|----|
| 32 | Table of contents .....                                                              | 2  |
| 33 | Supplementary Texts .....                                                            | 5  |
| 34 | Supplementary Text 1 – Role of <i>sbmA</i> and <i>marR</i> genes in cross-resistance |    |
| 35 | and collateral sensitivity to antimicrobial peptides in a laboratory and a           |    |
| 36 | clinical <i>E. coli</i> background .....                                             | 5  |
| 37 | Supplementary Text 2 - Potential mechanisms contributing to cross-                   |    |
| 38 | resistance between aminoglycosides and antimicrobial peptides .....                  | 6  |
| 39 | Supplementary Text 3 - Potential mechanism of collateral sensitivity of              |    |
| 40 | <i>ompC</i> loss-of-function mutant to pore-forming peptides .....                   | 7  |
| 41 | Supplementary Text 4 – Drug cycling based on antibiotic and antimicrobial            |    |
| 42 | peptide combinations .....                                                           | 8  |
| 43 | Supplementary Methods .....                                                          | 10 |
| 44 | Supplementary Method 1- Promoter activity measurements .....                         | 10 |
| 45 | Supplementary Method 2 - Experimental evolution of CAP18 resistance ...              | 11 |
| 46 | Supplementary Method 3 - Competition assay.....                                      | 12 |
| 47 | Supplementary Method 4 - pORTMAGE-based insertion of resistance-                     |    |
| 48 | associated mutations.....                                                            | 13 |
| 49 | Supplementary Method 5 – Surface charge measurements.....                            | 15 |
| 50 | Supplementary Method 6 - High-throughput measurement of relative surface             |    |
| 51 | charge by a poly-L-lysine binding assay .....                                        | 16 |
| 52 | Supplementary Tables .....                                                           | 17 |
| 53 | Supplementary Table 1 – Antibiotics employed and their modes of actions              | 17 |
| 54 | Supplementary Table 2 – The list of antimicrobial peptides employed in this          |    |
| 55 | study and the available information about them based on literature mining            |    |
| 56 | .....                                                                                | 18 |
| 57 | Supplementary Table 3 – Dataset of collateral sensitivity and cross-                 |    |
| 58 | resistance interactions identified at the level of antibiotic-resistant strains      | 18 |
| 59 | Supplementary Table 4 – Relative changes in the minimum inhibitory                   |    |
| 60 | concentrations (MIC) of the antimicrobial peptides towards antibiotic-               |    |
| 61 | resistant strains .....                                                              | 18 |
| 62 | Supplementary Table 5 – Fraction of collateral sensitivity (blue) and cross-         |    |

|    |                                                                                        |    |
|----|----------------------------------------------------------------------------------------|----|
| 63 | resistance (orange) interactions in each strain cluster (S1-4) for each                |    |
| 64 | peptide cluster (P1-3) .....                                                           | 19 |
| 65 | Supplementary Table 6 – List of the main chemical and physical properties              |    |
| 66 | of the antimicrobial peptides employed in this study .....                             | 20 |
| 67 | Supplementary Table 7 – Susceptibility profiles of antibiotic-resistant <i>E. coli</i> |    |
| 68 | clinical isolates across antimicrobial peptides .....                                  | 20 |
| 69 | Supplementary Table 8 – Differential expression analysis of RNA-Seq data               |    |
| 70 | of 24 antibiotic-resistant strains .....                                               | 20 |
| 71 | Supplementary Table 9 – Bile acid sensitivity of the antibiotic-resistant              |    |
| 72 | strains and list of genes involved in phospholipid and LPS synthesis.....              | 20 |
| 73 | Supplementary Table 10 – List of genes sensitizing towards CAP18 and                   |    |
| 74 | CP1 in the chemogenomic study.....                                                     | 20 |
| 75 | Supplementary Table 11 – Upregulation of LPS-related genes sensitize to                |    |
| 76 | CAP18 .....                                                                            | 21 |
| 77 | Supplementary Table 12 – Combination Indices (CI) characterizing the                   |    |
| 78 | antibiotic-PGLA interactions in the wild-type and corresponding antibiotic-            |    |
| 79 | resistant strains .....                                                                | 22 |
| 80 | Supplementary Table 13 – Combination index (CI) values of PGLA–antibiotic              |    |
| 81 | (AB) combinations on <i>E. coli</i> clinical isolates and respective antibiotic-       |    |
| 82 | resistant strains .....                                                                | 23 |
| 83 | Supplementary Table 14 – Mutation-incorporating pORTMAGE                               |    |
| 84 | oligonucleotides, allele-specific colony-PCR, HRM PCR and sequencing                   |    |
| 85 | primers.....                                                                           | 23 |
| 86 | Supplementary Figures .....                                                            | 24 |
| 87 | Supplementary Figure 1 - Distribution of the strength of collateral sensitivity        |    |
| 88 | (blue) and cross-resistance (orange) interactions .....                                | 24 |
| 89 | Supplementary Figure 2 - Hydrophobicity and isoelectric point jointly separate         |    |
| 90 | the P1 and P3 peptide clusters .....                                                   | 25 |
| 91 | Supplementary Figure 3 - Chemical and physical properties of the peptides              |    |
| 92 | that differentiate P2 and P1/P3 antimicrobial peptide groups .....                     | 26 |
| 93 | Supplementary Figure 4 - Cross-resistance (orange) and collateral sensitivity          |    |
| 94 | (blue) caused by resistant mutations in an antibiotic-sensitive clinical isolate       |    |
| 95 | <i>E. coli</i> background .....                                                        | 27 |

|     |                                                                                                                |    |
|-----|----------------------------------------------------------------------------------------------------------------|----|
| 96  | Supplementary Figure 5 - Increased expression level in membrane-related                                        |    |
| 97  | genes is associated with collateral sensitivity to antimicrobial peptides.....                                 | 29 |
| 98  | Supplementary Figure 6 - Genome-wide chemogenomic screen.....                                                  | 30 |
| 99  | Supplementary Figure 7 - Cellular surface charge (zeta potential) of the                                       |    |
| 100 | <i>marR</i> single-mutant ( <i>marR</i> <sup>*</sup> ) and the <i>waaY</i> overexpressing strain ( <i>waaY</i> |    |
| 101 | plasmid).....                                                                                                  | 32 |
| 102 | Supplementary Figure 8 - Inactivation of <i>waaY</i> in <i>marR</i> mutant strains leads                       |    |
| 103 | to the loss of collateral sensitivity towards P3 peptides .....                                                | 33 |
| 104 | Supplementary Figure 9 - Impact of PGLA-ciprofloxacin cotreatment on                                           |    |
| 105 | resistance level in <i>Escherichia coli</i> clinical isolates .....                                            | 35 |
| 106 | Supplementary Figure 10 – Impact of PGLA–nalidixic acid co-treatment on                                        |    |
| 107 | resistance level in <i>Klebsiella pneumoniae</i> and <i>Shigella flexneri</i> strains.....                     | 36 |
| 108 | Supplementary Figure 11 – Population size of evolving lines throughout the                                     |    |
| 109 | evolutionary experiment .....                                                                                  | 37 |
| 110 | Supplementary Figure 12 - Changes in cellular surface charge upon                                              |    |
| 111 | adaptation to antibiotics in the absence and presence of a subinhibitory                                       |    |
| 112 | dosage of PGLA .....                                                                                           | 38 |
| 113 | Supplementary Figure 13 - Susceptibility of CAP18-resistant lines towards a                                    |    |
| 114 | set of conventional antibiotics .....                                                                          | 40 |
| 115 | Supplementary Figure 14 – Outcome of competition between drug-resistant                                        |    |
| 116 | and wild-type strains.....                                                                                     | 41 |
| 117 | Supplementary Figure 15 - Altered membrane composition in antibiotic-                                          |    |
| 118 | resistant bacteria contributes to increased sensitivity to antimicrobial                                       |    |
| 119 | peptides when genes with stationary phase dependent expression were                                            |    |
| 120 | excluded .....                                                                                                 | 42 |
| 121 | Supplementary Figure 16 - Antibiotic-antimicrobial peptide combination                                         |    |
| 122 | measurements: schematic representation of the plate set up (a) and the                                         |    |
| 123 | combination assay (b). .....                                                                                   | 44 |
| 124 | Supplementary Figure 17 - Overexpression of <i>rpoE</i> sigma factor eliminates                                |    |
| 125 | collateral sensitivity of <i>ompC</i> loss-of function mutant.....                                             | 45 |
| 126 | Supplementary Figure 18 - Sublethal dosages of PGLA leads to <i>degP</i>                                       |    |
| 127 | activation in the wild-type strain, but not in the <i>ompC</i> loss-of-function mutant                         |    |
| 128 | .....                                                                                                          | 46 |
| 129 |                                                                                                                |    |

130

## Supplementary Texts

131

### 132 **Supplementary Text 1 – Role of *sbmA* and *marR* genes in cross-** 133 **resistance and collateral sensitivity to antimicrobial peptides in a** 134 **laboratory and a clinical *E. coli* background**

135 The *sbmA* and *marR* genes play a key role in the observed cross-resistance  
136 (CR) and collateral sensitivity (CS) patterns of antibiotic-resistant strains  
137 towards antimicrobial peptides (Table 1, main text). Deletion of *sbmA* is an  
138 important contributor to the cross-resistance of aminoglycoside-resistant  
139 strains to the proline-rich P2 peptides, while the Val84Glu mutation of *marR*  
140 yields widespread collateral sensitivity to P3 peptides (Table 1, main text). To  
141 evaluate whether these mutations contribute to CS and CR when they are  
142 present in a pathogenic bacterial background, we inserted these two  
143 mutations into the antibiotic-sensitive clinical isolate *E. coli* ATCC 25922, a  
144 strain used as a standard control for antibiotic susceptibility in clinical  
145 laboratories.

146 Results in *E. coli* ATCC 25922 and *E. coli* BW25113 fully agree. As  
147 expected, deletion of *sbmA* in the clinical isolate *E. coli* ATCC 25922 provides  
148 resistance to aminoglycosides tobramycin (TOB) and kanamycin (KAN), while  
149 simultaneously confers cross-resistance to the proline-rich P2 peptides  
150 Bactenecin 5 (BAC5) and Apidaecin IB (AP) (Supplementary Figure 4A-D).  
151 Moreover, this mutation caused increased sensitivity towards P3 peptides  
152 indolicidin (IND) and human beta defensin 3(HBD3) in both strains  
153 (Supplementary Figure 4E-F and Table 1).

154 In a similar way, the phenotypic effects of the mutation Val84Glu in the  
155 *marR* gene are very similar in the two *E. coli* strains. It results in increased  
156 resistance to various antibiotics, including tetracycline (TET) and  
157 chloramphenicol (CHL), while the same mutation causes collateral sensitivity  
158 to P3 peptides, such as HBD3 and CAP18 (Supplementary Figure 4G-J).

159 **Supplementary Text 2 - Potential mechanisms contributing to**  
160 **cross-resistance between aminoglycosides and antimicrobial**  
161 **peptides**

162 In addition to the mechanisms described in the main text, we noted that  
163 aminoglycoside-resistant strains uniquely accumulated mutations in a broad  
164 class of genes that reduced the membrane electrochemical potential, a  
165 pattern also observed in aminoglycoside-resistant clinical isolates<sup>1</sup>. This could  
166 be significant, as there are similarities in the cellular uptake mechanisms of  
167 aminoglycosides and proline-rich antimicrobial peptides<sup>2</sup>. By decreasing the  
168 electrical potential across the inner membrane (i.e by membrane  
169 depolarization), resistant bacteria reduce the cellular uptake of  
170 aminoglycosides and proline-rich peptides as well. To gain further support of  
171 this idea, we focused on a gene involved in K<sup>+</sup> uptake (*trkH*) that was  
172 repeatedly mutated in the aminoglycoside-resistant strains. A typical mutation  
173 was inserted into wild-type *E. coli*, resulting in a diminished membrane  
174 potential<sup>1</sup>. As a consequence, susceptibility to both aminoglycosides and 2  
175 out of the 4 proline-rich antimicrobial peptides (P2) decreased (see details in  
176 Table 1).

177

178 **Supplementary Text 3 - Potential mechanism of collateral**  
179 **sensitivity of *ompC* loss-of-function mutant to pore-forming**  
180 **peptides**

181 The *ompC* loss-of-function mutation contributes to resistance to antibiotics via  
182 reducing the uptake of hydrophilic antibiotics<sup>3,4</sup>, but simultaneously enhances  
183 susceptibility to antimicrobial peptides, mainly those belonging to P2 and P3  
184 groups (Table 1). What can be the mechanism leading to sensitivity to  
185 antimicrobial peptides? It has been established that under conditions that lead  
186 to outer membrane stress (such as detergents, metal ions and antimicrobial  
187 peptides), porins act as an upstream signal sensor that modulates *rpoE*  
188 activity<sup>5-8</sup>. *RpoE* is a sigma factor involved in maintaining the integrity of  
189 periplasmic and outer membrane components<sup>8</sup>. Specifically, *rpoE* and its  
190 targets such as the *degP* protease and genes involved in LPS biogenesis  
191 (*lpxD*, *lpxA*) play an important role in resistance to antimicrobial peptides<sup>9-12</sup>.  
192 Moreover, bacterial cells lacking porins or *rpoE* are sensitive to antimicrobial  
193 peptides and metal ions<sup>7,8</sup>. Based on these facts we hypothesized that the  
194 lack of *ompC* due to specific inactivating mutations leads to the reduction of  
195 the *rpoE* regulon-mediated response to membrane perturbations, which in  
196 turn results in enhanced susceptibility towards antimicrobial peptides. To test  
197 this hypothesis, two independent experiments were performed with an *ompC*  
198 loss-of-function mutant (see details in Table 1). First, we found that  
199 overexpression of *rpoE* diminishes collateral sensitivity of the *ompC* mutant  
200 towards peptides PGLA and HBD3 (Supplementary Figure 17). Moreover, we  
201 demonstrated that the *rpoE* dependent periplasmic protease, *degP* was  
202 significantly up-regulated after exposure to a sublethal level of the peptide  
203 PGLA in the wild-type strain, but not in the *ompC* mutant strain  
204 (Supplementary Figure 18). Taken together, these results indicate that a  
205 reduced *rpoE*-mediated outer membrane stress response following exposure  
206 to antimicrobial peptide underpins the collateral sensitivity of the *ompC* loss-  
207 of-function mutant strain to antimicrobial peptides.

208

209 **Supplementary Text 4 – Drug cycling based on antibiotic and**  
210 **antimicrobial peptide combinations**

211 Reciprocal collateral sensitivity is an emerging concept for the development of  
212 drug pairs that, in specific situations, may be useful to hinder resistance  
213 evolution via drug cycling in clinical conditions<sup>13,14</sup>. A prerequisite for the use  
214 of a drug cycling strategy is the reciprocal nature of the collateral sensitivity  
215 interaction, i.e. that resistance to drug A leads to sensitivity to drug B and  
216 *vice-versa*. To begin to investigate whether collateral sensitivity to  
217 antimicrobial peptides is reciprocal and therefore can be used for drug cycling,  
218 we generated and analyzed antimicrobial peptide resistant strains, as follows:

219 *Laboratory evolution and phenotype profiling of antimicrobial peptide resistant*  
220 *strains*

221 The purpose of this experiment was to demonstrate reciprocal collateral  
222 sensitivity between conventional antibiotics and antimicrobial peptides. We  
223 evolved 10 parallel populations of laboratory *E. coli* BW25113 towards the  
224 peptide CAP18 (Supplementary Method 2). CAP18 appears to be an ideal  
225 candidate for two reasons. First, numerous antibiotic-resistant strains exhibit  
226 collateral sensitivity against this peptide. Second, we found that evolution  
227 against this peptide readily occurs in the laboratory. More specifically, after  
228 only 130 generations, the 10 parallel lines reached as high as 256-657  
229 increment in MIC level against CAP18 during the course of laboratory  
230 evolution.

231 Next, we isolated one strain from each of the five independently evolved  
232 populations with the highest CAP18 resistance level. We measured the  
233 susceptibility of these five CAP18-resistant strains towards 6 antibiotics,  
234 including tetracycline (TET), doxycycline (DOX), erythromycin (ERY), cefoxitin  
235 (FOX), nalidixic acid (NAL) and nitrofurantoin (NIT). We found that adaptation  
236 to CAP18 resulted in strong collateral sensitivity to four out of the six  
237 antibiotics tested (DOX, ERY, NAL and NIT). Strikingly, CAP18 resistant  
238 strains showed an up to 11-fold decrease in minimum inhibitory  
239 concentrations (Supplementary Figure 13).



240 *Competition experiments*

241 To investigate whether antibiotic-antimicrobial peptide pairs exhibiting  
242 reciprocal collateral sensitivity specifically inhibit the growth of resistant  
243 bacteria, we performed two competition experiments (Supplementary Method  
244 3). We focused on nalidixic acid – CAP18 drug pairs. Nalidixic acid is an  
245 optimal candidate, as it is a bactericidal drug, and CAP18 resistant strains  
246 show an especially high sensitivity to nalidixic acid (Supplementary Figure  
247 14). The NAL-resistant strains have accumulated mutations in an overlapping  
248 set of genes<sup>1,15</sup>, and have very similar resistance and collateral sensitivity  
249 profiles to each other<sup>1,15</sup>. Therefore, we focused on a single, representative  
250 strain (NAL7) only.

251 In the first experiment, NAL7 and the wild-type were set to compete at various  
252 concentrations of CAP18. In the second experiment, a randomly selected  
253 CAP18-resistant strain (CAP18\_5) and the wild-type were set to compete at  
254 various concentrations of Nalidixic acid. In both cases, the strains were  
255 inoculated at an equal ratio at the start of the experiments. In both  
256 experiments 1 and 2, we identified a drug concentration range where the wild-  
257 type reached 100% frequency after as few as 18 hours of growth, and thereby  
258 outcompeted the resistant strain (Supplementary Figure 14). These results  
259 indicate that cyclical application of NAL and CAP18 may be feasible for the  
260 eradication of bacteria acquiring resistance to any of the two antimicrobials  
261 throughout the cycles.

262

## Supplementary Methods

### 263 **Supplementary Method 1- Promoter activity measurements**

264 To measure changes in the promoter activity of *degP* in response to PGLA  
265 stress, we used a selected construct from a comprehensive GFP transcription  
266 reporter library<sup>16</sup> and transferred them into two different genetic backgrounds:  
267 the wild-type and the *ompC*[Met1Ile] mutant strains<sup>16</sup>. The reporter strain  
268 bears a low-copy plasmid with a promoter of interest controlling the  
269 expression of a fast folding GFP and carries a kanamycin resistance cassette.  
270 These plasmid-carrying strains were cultured overnight and optical densities  
271 were adjusted to OD<sub>600</sub>=0.2. 100 µl of bacterial cultures were transferred to  
272 black 96-well microtiter plates and treated with three different PGLA  
273 concentrations (0, 1/2 and 4/5 of the MIC), in 4 replicates each. Plates were  
274 incubated in a Synergy 2 microplate reader at 30°C in medium supplemented  
275 with 50 µg/ml kanamycin. The OD and fluorescence curves were measured  
276 for 2h with 15s delays between readings. The first 15 data points were  
277 excluded from further analysis due to the high standard deviation between  
278 replicates. Data curves were smoothed and fluorescence per OD ratio curves  
279 were calculated. Next, areas under these ratio curves were determined.  
280 Finally, we calculated changes in GFP fluorescence intensity relative to the  
281 appropriate untreated controls derived from the same experiment.

282

283 **Supplementary Method 2 - Experimental evolution of CAP18**  
284 **resistance**

285 Resistance to CAP18 was achieved by a previously established automated  
286 evolution experiment<sup>17,18</sup>. Starting with a subinhibitory CAP18 concentration,  
287 10 parallel cultures were allowed to grow in Minimal salts medium (See  
288 Materials and Methods) at 30°C degree. A chess-board layout was used on  
289 the plate to monitor potential cross-contamination events. After 24 hours of  
290 incubation, 20 µl of 350µl culture was transferred to four independent wells  
291 containing fresh medium and increasing dosages of CAP18 (0.5x, 1x, 1.5x  
292 and 2.5x the concentration of the previous step). Prior to each transfer, cell  
293 growth was monitored by measuring the optical density at 600 nm  
294 (OD<sub>600</sub> value, Biotek Synergy 2 microplate reader was used for this purpose).  
295 Only populations with the highest drug concentration (and reaching OD<sub>600</sub> >  
296 0.2) were selected for further evolution. Accordingly, only one of the four  
297 populations was retained for each independently evolving lineage. This  
298 protocol was designed to avoid population extinction and to ensure that  
299 populations with the highest level of resistance were propagated further  
300 during evolution. Evolution lasted approximately 130 generations (20  
301 transfers).

302

303

### 304 **Supplementary Method 3 - Competition assay.**

305 To evaluate whether antibiotic-antimicrobial peptide pairs exhibiting reciprocal  
306 collateral sensitivity inhibit the survival of resistant bacteria, we performed two  
307 competition experiments. In the first experiment, a NAL-resistant strain  
308 (NAL7) and the wild-type strain were competing in the presence of various  
309 concentrations of CAP18. The second experiment was vice-versa, *i.e.* a  
310 CAP18-resistant strain (CAP18\_5) and the wild-type were competing under  
311 NAL stress. In both cases the initial ratio between the resistant and the wild-  
312 type strains was set to 1:1.

313 The wild-type (WT) and the investigated resistant strain (NAL7 or  
314 CAP18\_5) were inoculated at an equal ratio with approximately  $10^4$  cells per  
315 genotype per mL in minimal salts medium. Parallel co-cultures were treated  
316 with various concentrations of CAP18 or NAL, respectively (3 biological  
317 replicates for each concentration and 3 biological replicates of untreated  
318 control co-cultures). At the beginning of the experiment (T0) as well as  
319 following 18 hours of incubation at 30°C with shaking (T18), serial dilutions  
320 were plated onto drug-free agar plates and agar plates supplemented with  
321 NAL (20µg/mL) or CAP18 (25 µg/mL), respectively. The drug-containing agar  
322 plates inhibited the growth of the wild-type, which allowed us to count the  
323 number of resistant colony forming units (CFU), while the number of total  
324 CFUs was counted on the drug-free agar plates. Viable colonies were  
325 counted after 24 hours of incubation on 30°C. The number of wild-type  
326 colonies was inferred by subtracting of the number of resistant CFUs from  
327 the number of total CFUs. To assure the accuracy of the results, T0 controls  
328 of both wild-type and resistant strains were plated both from co-cultures and  
329 alone onto both drug-free and drug-containing agar plates.

330

331 **Supplementary Method 4 - pORTMAGE-based insertion of**  
332 **resistance-associated mutations**

333 The previously described pORTMAGE<sup>19</sup> method was used to introduce  
334 antibiotic resistance-associated mutations in *Escherichia coli* ATCC 25922<sup>20</sup>  
335 and inactivate the *waaY* gene in *Escherichia coli* BW25113 wild-type, marR  
336 Val84Glu mutant (marR\*), TET3, DOX3 and NAL7 strains. Briefly, individual  
337 mutations were introduced via synthetic ssDNA-mediated recombineering.  
338 These oligos were designed using MODEST<sup>21</sup>, were 90 nucleotides long and  
339 had complementary sequences to the replicating lagging strand with a  
340 minimized secondary structure ( $\geq -12$  kcal/mol). Oligonucleotides were ordered  
341 from Integrated DNA Technologies (Coralville, IA, USA) with standard  
342 desalting. Recombineering was performed in the corresponding  
343 electrocompetent cells carrying pORTMAGE3 (Addgene plasmid ID: 72678).  
344 pORTMAGE3 was induced at 42°C for 15 minutes to allow for efficient  
345 mutation-incorporation and avoid off-target mutagenesis<sup>19</sup>. For each target  
346 strain 40  $\mu$ l of induced electrocompetent cells were transformed with 1  $\mu$ l of  
347 100  $\mu$ M mutation-carrying oligo. Cells were recovered in 5 ml Terrific-Broth  
348 (TB) media (24 g yeast extract, 12 g tryptone, 9.4 g K<sub>2</sub>HPO<sub>4</sub>, and 2 g KH<sub>2</sub>PO<sub>4</sub>  
349 per 1 L of water) after electroporation and incubated at 30°C for 60 minutes,  
350 after which 5 ml Lysogeny-Broth-Lennox (LB<sup>L</sup>) media (10 g tryptone, 5 g yeast  
351 extract, 5 g sodium chloride per 1 L water) was added and incubated at 30°C  
352 overnight. Cultures were then plated onto LB<sup>L</sup> agar plates in appropriate  
353 dilutions to form individual colonies and incubated at 30°C overnight.

354 Colonies carrying the desired mutations were selected using either  
355 allele-specific colony-PCR or High Resolution Melting (HRM) analysis. Allele-  
356 specific colony-PCRs have been performed with DreamTaq Master Mix  
357 (Thermo Scientific) according to a standard protocol<sup>19</sup>. High-Resolution  
358 Melting (HRM) colony-PCRs have been performed with Luminaris HRM  
359 Master Mix (Thermo Scientific) in a Bio-Rad CFX96 qPCR machine according  
360 to the manufacturer's guidelines. Mutations were confirmed by capillary-  
361 sequencing. Finally, the pORTMAGE3 plasmid was removed from the  
362 sequence-verified colonies by growing the cells overnight at 42°C in antibiotic-

363 free LB<sup>L</sup> media. Mutation-incorporating pORTMAGE oligonucleotides, allele-  
364 specific colony-PCR, HRM PCR and sequencing primers are listed in  
365 Supplementary Table 14.

366

## 367 **Supplementary Method 5 – Surface charge measurements**

368 Zeta potential measurement was performed on a Zetasizer Nano ZS instrument  
369 (Malvern Instruments), based on a previously established protocol, where changes in  
370 surface charge upon antimicrobial peptide treatment were measured in *Escherichia*  
371 *coli*<sup>22</sup>. Briefly, overnight grown bacteria were diluted in filtered phosphate-buffered  
372 saline (PBS) to reach a  $10^6$  cells/ml concentration and then washed (centrifuging at  
373 3000 rpm for 10 mins at 4°C) and resuspended in filtered PBS. Bacterial samples  
374 were kept at 4°C until measurement. Upon measurement, samples were dispensed  
375 into disposable zeta cells with gold electrodes and allowed to equilibrate for 15 min at  
376 25°C, before measuring at 25°C. Zeta potential was calculated from the measured  
377 electrophoretic mobility using the Smoluchowski approximation of the Henry  
378 equation<sup>23</sup>. Zeta potential was determined based on 8 technical and 5 biological  
379 replicates of both *marR* single-mutant and *waaY* overexpressing strains (the latter  
380 carried the *waaY* overexpression plasmid of the ASKA collection), and the respective  
381 controls (wild-type and wild-type containing the empty plasmid of the ASKA  
382 collection, respectively).

383

384

385 **Supplementary Method 6 - High-throughput measurement of**  
386 **relative surface charge by a poly-L-lysine binding assay**

387 To investigate changes in bacterial cell surface charge in a high-throughput  
388 manner (i.e. for dozens of strains), we performed a fluorescein isothiocyanate-  
389 labeled poly-L-lysine (Sigma) binding assay. Poly-L-lysine is a polycationic  
390 molecule that is widely used to study the interaction between cationic peptides  
391 and charged lipid bilayer membranes<sup>24</sup>. The binding assay was performed as  
392 described previously<sup>25</sup>. In brief, cells were grown overnight in minimal medium  
393 and then washed twice with 1X phosphate-buffered saline (PBS) buffer. The  
394 cells were suspended in the PBS buffer to a final OD<sub>600</sub> of 0.1. The  
395 suspension was incubated with 6.5 µg ml<sup>-1</sup> poly-L-lysine for 10 min and  
396 centrifuged 5500rpm for 5 min. The remaining amount of poly-L-lysine in the  
397 supernatant was determined fluorometrically (excitation at 500 nm and  
398 emission at 530 nm) without or with bacterial exposure. The quantity of bound  
399 molecules was calculated from the difference between these values. The  
400 lower the amount of bound poly-L-lysine, the less negatively charged the cell  
401 surface is.



402

**Supplementary Tables**

403

404 **Supplementary Table 1 – Antibiotics employed and their modes of**  
 405 **actions**

| <b>Antibiotic</b> | <b>Abbreviation</b> | <b>Mode of action</b>                      | <b>Type of action</b> |
|-------------------|---------------------|--------------------------------------------|-----------------------|
| Ampicillin        | AMP                 | Cell wall                                  | Bactericidal          |
| Cefoxitin         | FOX                 | Cell wall                                  | Bactericidal          |
| Ciprofloxacin     | CPR                 | Gyrase                                     | Bactericidal          |
| Nalidixic acid    | NAL                 | Gyrase                                     | Bactericidal          |
| Nitrofurantoin    | NIT                 | Multiple mechanisms                        | Bactericidal          |
| Kanamycin         | KAN                 | Protein synthesis, 30S,<br>Aminoglycosides | Bactericidal          |
| Tobramycin        | TOB                 | Protein synthesis, 30S,<br>Aminoglycosides | Bactericidal          |
| Tetracycline      | TET                 | Protein synthesis, 30S                     | Bacteriostatic        |
| Doxycycline       | DOX                 | Protein synthesis, 30S                     | Bacteriostatic        |
| Chloramphenicol   | CHL                 | Protein synthesis, 50S                     | Bacteriostatic        |
| Erythromycin      | ERY                 | Protein synthesis, 50S                     | Bacteriostatic        |
| Trimethoprim      | TRM                 | Folic acid biosynthesis                    | Bacteriostatic        |

406

407

408

409

410 **Supplementary Table 2 – The list of antimicrobial peptides**  
411 **employed in this study and the available information about them**  
412 **based on literature mining**

413 Provided in a separate Excel spreadsheet.

414

415 **Supplementary Table 3 – Dataset of collateral sensitivity and**  
416 **cross-resistance interactions identified at the level of antibiotic-**  
417 **resistant strains**

418 Provided in a separate Excel spreadsheet.

419

420 **Supplementary Table 4 – Relative changes in the minimum**  
421 **inhibitory concentrations (MIC) of the antimicrobial peptides**  
422 **towards antibiotic-resistant strains**

423 Provided in a separate Excel spreadsheet.

424

425 **Supplementary Table 5 – Fraction of collateral sensitivity (blue)**  
 426 **and cross-resistance (orange) interactions in each strain cluster**  
 427 **(S1-4) for each peptide cluster (P1-3)**

428 Collateral sensitivity dominates, especially in the case of the S3 strain cluster,  
 429 in which marR mutations are enriched. The highest degree of collateral  
 430 sensitivity is exhibited against the pore-forming P3 peptides ( $p < 0.0001$ ,  
 431 Fisher's exact test). Cross-resistance of antibiotic-resistant bacteria to P2  
 432 peptides is frequent ( $p < 0.0001$ , Fisher's exact test).

Fraction of Collateral Sensitivity

|    | P3   | P2   | P1   |
|----|------|------|------|
| S1 | 0.46 | 0.18 | 0.05 |
| S2 | 0.17 | 0.06 | 0.01 |
| S3 | 0.6  | 0.19 | 0.17 |
| S4 | 0.67 | 0.02 | 0.28 |

Fraction of Cross-Resistance

|    | P3   | P2   | P1   |
|----|------|------|------|
| S1 | 0.06 | 0.17 | 0    |
| S2 | 0.26 | 0.31 | 0.18 |
| S3 | 0.06 | 0.06 | 0.01 |
| S4 | 0.06 | 0.69 | 0.02 |

433

434

435

436 **Supplementary Table 6 – List of the main chemical and physical**  
437 **properties of the antimicrobial peptides employed in this study**

438 Provided in a separate Excel spreadsheet.

439

440 **Supplementary Table 7 – Susceptibility profiles of antibiotic-**  
441 **resistant *E. coli* clinical isolates across antimicrobial peptides**

442 Provided in a separate Excel spreadsheet.

443

444 **Supplementary Table 8 – Differential expression analysis of RNA-**  
445 **Seq data of 24 antibiotic-resistant strains**

446 Provided in a separate Excel spreadsheet.

447

448 **Supplementary Table 9 – Bile acid sensitivity of the antibiotic-**  
449 **resistant strains and list of genes involved in phospholipid and**  
450 **LPS synthesis**

451 Provided in a separate Excel spreadsheet.

452

453 **Supplementary Table 10 – List of genes sensitizing towards CAP18**  
454 **and CP1 in the chemogenomic study**

455 Provided in a separate Excel spreadsheet.

456

457 **Supplementary Table 11 – Upregulation of LPS-related genes**  
 458 **sensitize to CAP18**

459 A chemogenomic screen revealed that LPS-related genes are highly enriched  
 460 among gene overexpressions that sensitize to CAP18 but not to control  
 461 peptide CP1 (p-values are FDR-adjusted values from two-sided Fisher’s exact  
 462 tests, n=3059); grey background denotes significant enrichments.

|                                        | CAP18      |          | CP1        |         |
|----------------------------------------|------------|----------|------------|---------|
|                                        | Odds ratio | p-value  | Odds ratio | p-value |
| <b>All LPS-related genes</b>           | 3.21       | 3.40E-05 | 1.26       | 1.00    |
| Lipid-A biosynthesis                   | 4.40       | 0.004    | 2.04       | 0.47    |
| Extracellular polysaccharide synthesis | 0.78       | 1.00     | 2.17       | 1.00    |
| LPS biosynthetic process               | 3.65       | 5.97E-05 | 0.18       | 0.64    |
| LPS core region synthesis              | 2.63       | 0.54     | 0          | 1.00    |
| LPS transport                          | 0.00       | 1.00     | NA         | 0.11    |
| <b>All phospholipid-related genes</b>  | 2.31       | 1.00     | 3.65       | 0.52    |
| Phospholipid transport                 | 1.96       | 1.00     | 5.44       | 0.85    |
| Phospholipid binding                   | 5.24       | 0.49     | 4.35       | 1.00    |

463

464

465 **Supplementary Table 12 – Combination Indices (CI) characterizing**  
 466 **the antibiotic-PGLA interactions in the wild-type and**  
 467 **corresponding antibiotic-resistant strains**

468 The combination index for a given antibiotic and antimicrobial peptide pair  
 469 was defined as the average of the combination index of the 7  
 470 antibiotic:antimicrobial peptide ratio. The cut-off values were  $CI \geq 1.14$  for  
 471 antagonism;  $CI \leq 0.86$  for synergism; and  $0.86 < CI < 1.14$  for no interaction (for  
 472 details see Materials and Methods). Relative combination index was  
 473 calculated as the ratio between CIs in the resistant strain and corresponding  
 474 wild-type strain for the same antibiotic-PGLA combination, so that Relative  
 475  $CI < 1$  represents induced synergism.

| Antimicrobial peptide | AB   | Wild-type strain | Resistant strain |      | Relative CI |
|-----------------------|------|------------------|------------------|------|-------------|
|                       |      | CI               | Strain           | CI   |             |
| PGLA                  | AMP  | 0.83             | AMP2             | 0.35 | 0.42        |
|                       |      |                  | AMP6             | 0.56 | 0.67        |
|                       |      |                  | AMP8             | 0.51 | 0.61        |
|                       | CHL  | 0.87             | CHL2             | 0.47 | 0.54        |
|                       |      |                  | CHL7             | 0.62 | 0.71        |
|                       | CPR  | 1.79             | CPR7             | 0.56 | 0.31        |
|                       |      |                  | CPR9             | 0.44 | 0.25        |
|                       | DOX  | 0.56             | DOX1             | 0.26 | 0.45        |
|                       |      |                  | DOX3             | 0.26 | 0.46        |
|                       | ERY  | 0.36             | ERY1             | 0.36 | 1.00        |
|                       |      |                  | ERY8             | 0.30 | 0.85        |
|                       | FOX  | 1.39             | FOX1             | 0.54 | 0.39        |
|                       |      |                  | FOX7             | 0.57 | 0.41        |
|                       | KAN  | 1.47             | KAN8             | 1.63 | 1.11        |
|                       |      |                  | KAN6             | 2.25 | 1.53        |
|                       | TET  | 0.93             | TET3             | 0.33 | 0.35        |
| TET1                  |      |                  | 0.37             | 0.40 |             |
| TOB                   | 1.43 | TOB10            | 1.73             | 1.21 |             |
|                       |      | TOB3             | 1.66             | 1.16 |             |
| TRM                   | 1.08 | TRM10            | 1.65             | 1.54 |             |
|                       |      | TRM6             | 1.60             | 1.49 |             |

476

477

478 **Supplementary Table 13 – Combination index (CI) values of PGLA–**  
479 **antibiotic (AB) combinations on *E. coli* clinical isolates and**  
480 **respective antibiotic-resistant strains**

481 Provided in a separate Excel spreadsheet.

482

483 **Supplementary Table 14 – Mutation-incorporating pORTMAGE**  
484 **oligonucleotides, allele-specific colony-PCR, HRM PCR and**  
485 **sequencing primers**

486 Provided in a separate Excel spreadsheet.

487

488

## Supplementary Figures

489

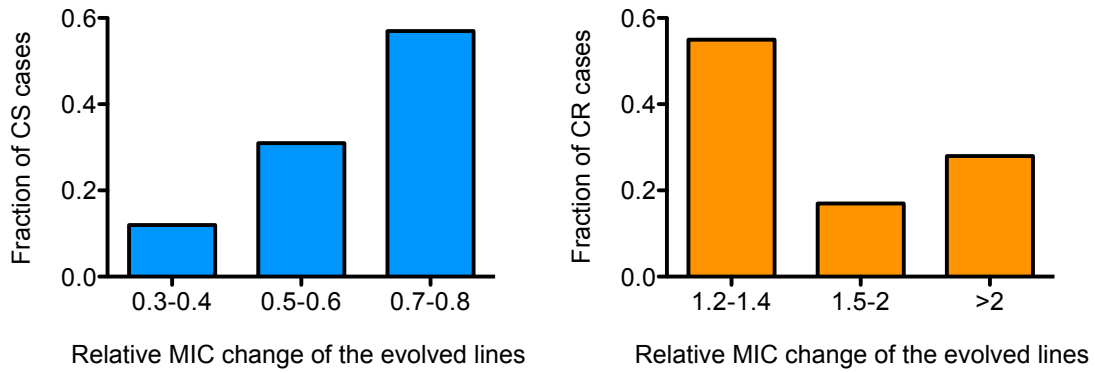

490

491 **Supplementary Figure 1 - Distribution of the strength of collateral**  
492 **sensitivity (blue) and cross-resistance (orange) interactions**

493 Abbreviation: MIC, minimum inhibitory concentration; CS, collateral sensitivity; CR,  
494 cross-resistance. Total sample size: CS n=49 strains and CR n=36 strains  
495 (Supplementary Table 4)

496



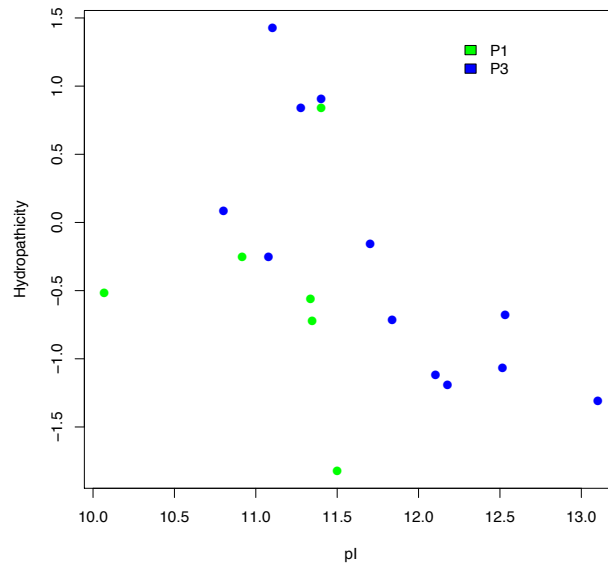

497

498 **Supplementary Figure 2 - Hydrophobicity and isoelectric point**  
 499 **jointly separate the P1 and P3 peptide clusters**

500 Antimicrobial peptides belonging to both P1 and P3 clusters generally insert  
 501 themselves into membrane bilayers to form pores and thus induce cell lysis.  
 502 However, the two groups differ in their collateral sensitivity profiles: while collateral-  
 503 sensitivity is frequent towards P3 peptides, antibiotic-resistant strains rarely display  
 504 either CS or CR interactions to P1 peptides. An analysis of the physicochemical  
 505 properties (Supplementary Table 5) of peptides belonging to P1 (n=6) and P3 (n=12)  
 506 clusters revealed that these peptides differ significantly when their isoelectric point  
 507 and hydrophobicity are considered together ( $p = 0.018$ , two-sided logistic regression,  
 508 likelihood ratio test). These properties likely affect the peptides' behavior in aqueous  
 509 solution and on the bacterial membrane surface, which could have a prominent effect  
 510 on peptide-membrane interaction, especially in antibiotic-resistant strains with altered  
 511 surface charge. As we could not identify any further biologically meaningful  
 512 physicochemical properties that separate these two peptide clusters, we hypothesize  
 513 that the difference in P1 and P3 cross-resistance and collateral sensitivity patterns  
 514 could be the result of a combination of their differences in hydrophobicity and  
 515 isoelectric point.

516

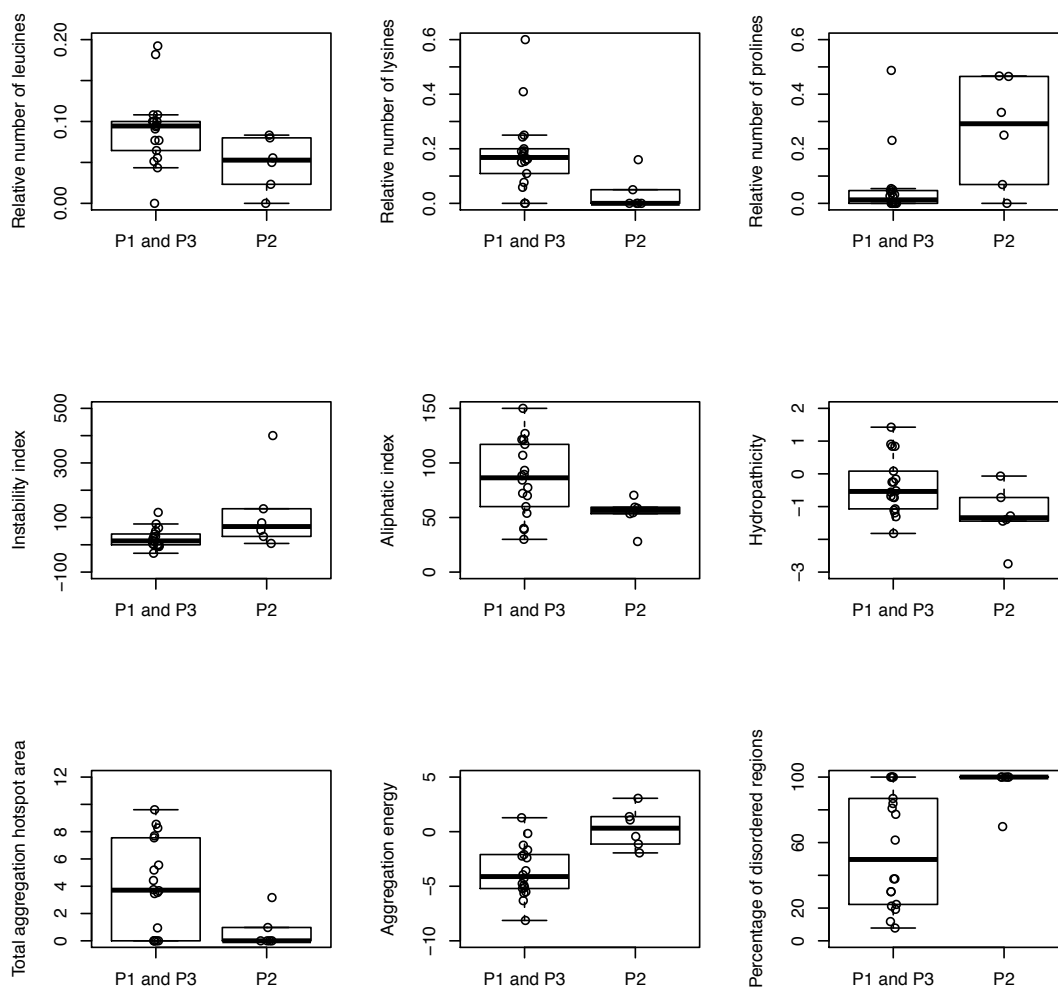

517

518 **Supplementary Figure 3 - Chemical and physical properties of the**  
 519 **peptides that differentiate P2 and P1/P3 antimicrobial peptide**  
 520 **groups**

521 The P2 peptide group (n=6) show significant differences ( $p < 0.05$  two-sided Wilcoxon  
 522 rank sum test) in the listed chemical properties from the P1 and P3 peptide groups  
 523 (n=18). P2 peptides consist of more proline, less lysine and leucine amino acids.  
 524 They are characterized by unstable secondary peptide structures; relatively low  
 525 aliphatic and hydropathicity indices, with smaller total aggregation-prone surfaces  
 526 and higher aggregation energies (for more details see Supplementary Table 5).  
 527 Boxplots present the median, first and third quartiles, with whiskers showing 1.5  
 528 times the interquartile range of the data.

529

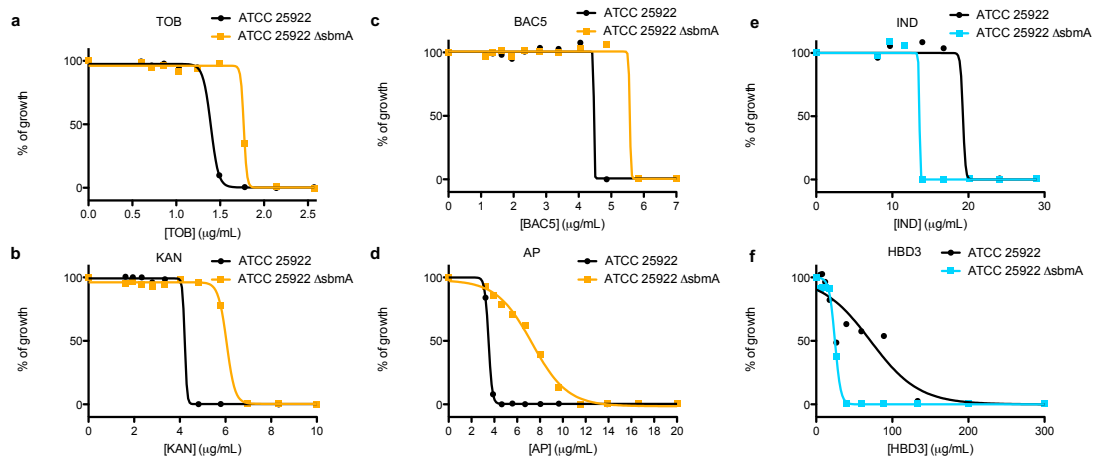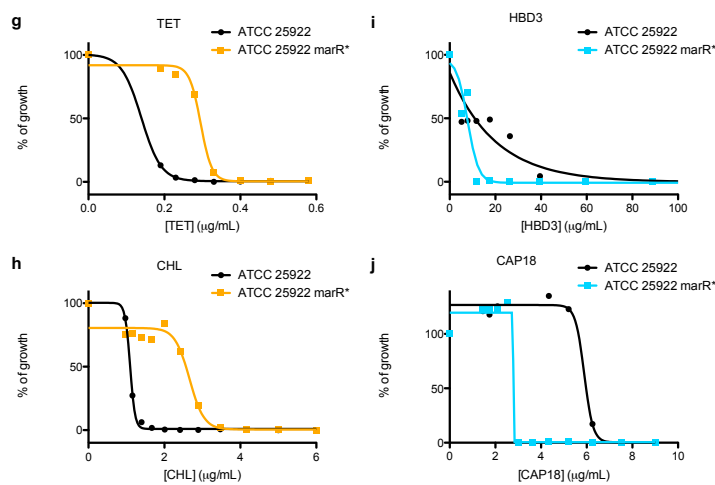

530

531 **Supplementary Figure 4 - Cross-resistance (orange) and collateral**  
532 **sensitivity (blue) caused by resistant mutations in an antibiotic-**  
533 **sensitive clinical isolate *E. coli* background**

534 Growth response curves of the clinical isolate *E. coli* ATCC 25922 strain (black) and  
535 the same strain carrying the deletion of *sbmA* gene (upper panels a-f) or the  
536 Val84Glu mutation in the *marR* gene (lower panels g-j), respectively. Cross-  
537 resistance and collateral sensitivity patterns of these mutations in the clinical isolate  
538 background are similar to those described in laboratory *E. coli* BW25133 (Table 1).  
539 Specifically, deletion of *sbmA* provides low level of resistance to aminoglycosides  
540 tobramycin (TOB) and kanamycin (KAN) as well as to proline-rich peptides  
541 bactericin 5 (BAC5) and apidaecin IB (AP). At the same time, the Val84Glu  
542 mutation of the *marR* gene causes widespread cross-resistance to antibiotics like  
543 tetracycline (TET) and chloramphenicol (CHL). Reassuringly, both mutations lead to  
544 collateral sensitivity to P3 peptides (e, f, i and j) similarly to what we have observed

545 in *E. coli* BW25113. Data in this figure is representative of at least 2 biological  
546 replicates.

547

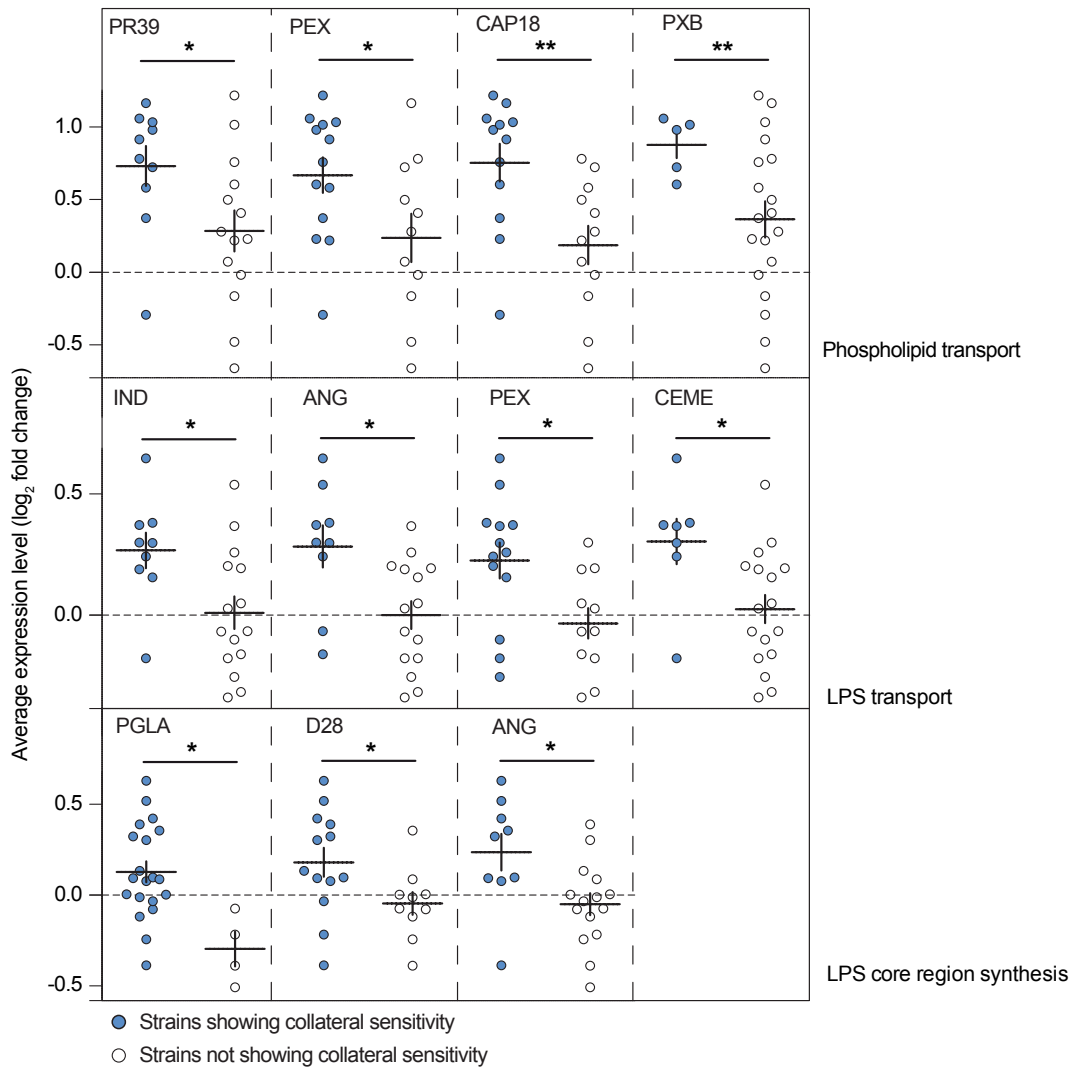

548

549 **Supplementary Figure 5 - Increased expression level in membrane-**  
 550 **related genes is associated with collateral sensitivity to**  
 551 **antimicrobial peptides**

552 Increased expression in membrane-associated genes is frequently observed in  
 553 antibiotic-resistant strains showing collateral sensitivity to a given antimicrobial  
 554 peptide compared to the rest of the strains (asterisks indicate p-values as follows:  
 555  $0.001 < ** < 0.01 < * < 0.05$ , two-sided Student's t-tests). Scatter plots show the  
 556 mean with whiskers showing the standard error of the mean. The sample size of  
 557 each condition used in the analysis is provided in the Supplementary Table 3.

558

559

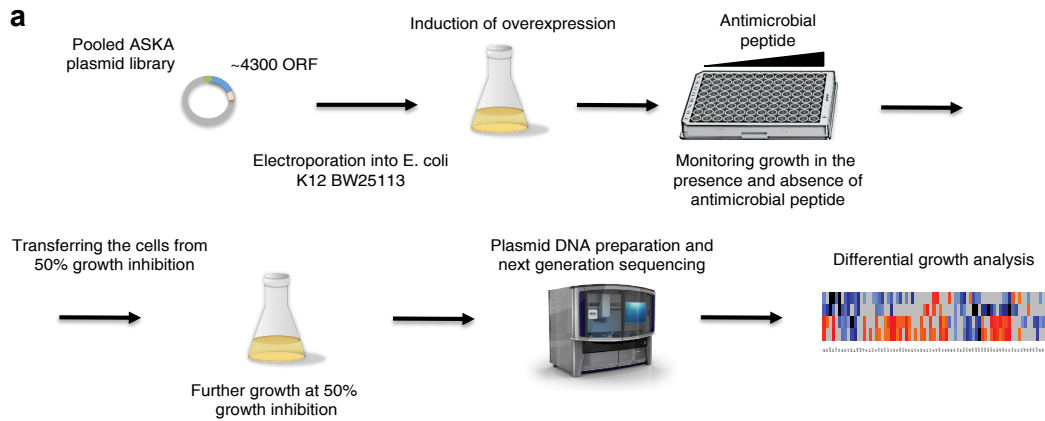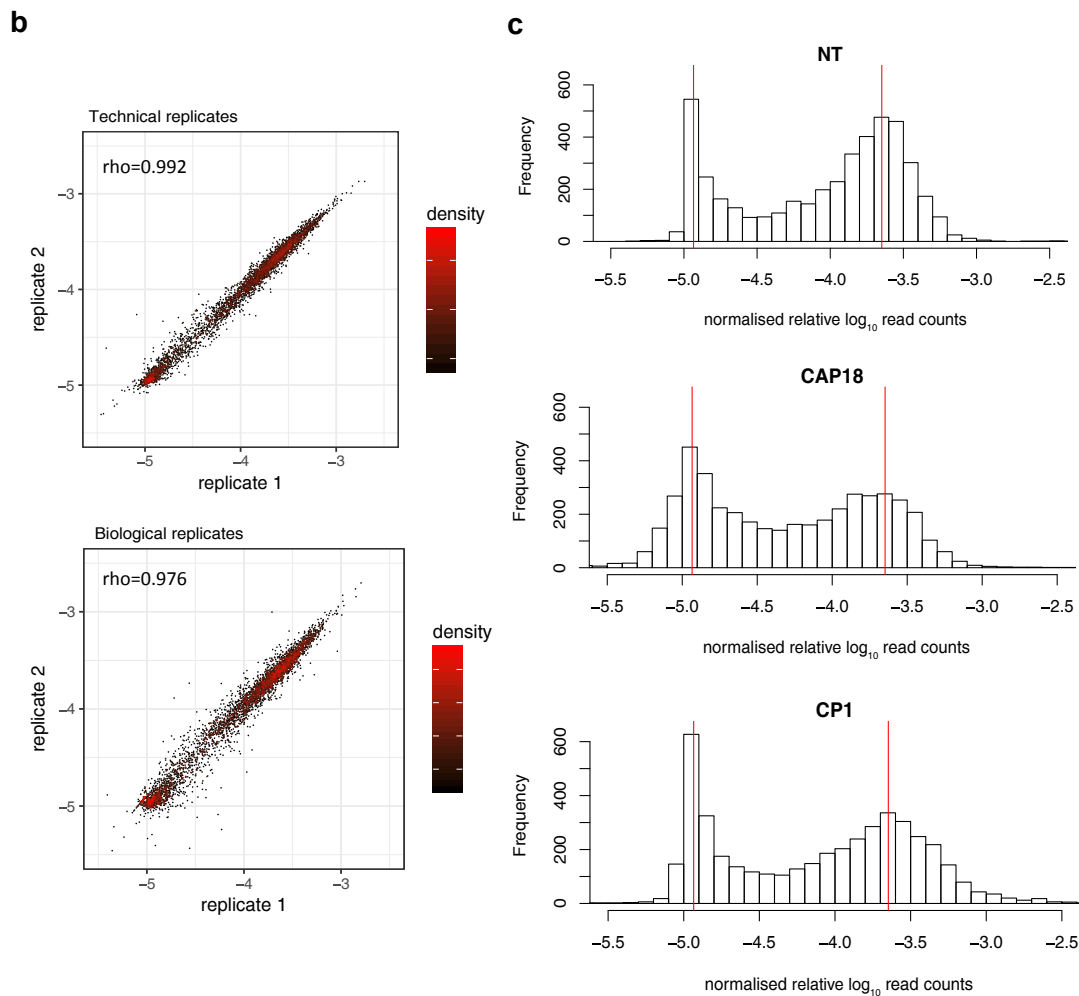

560

561 **Supplementary Figure 6 - Genome-wide chemogenomic screen**

562 a, The chemogenomic workflow applies a pooled fitness assay<sup>26</sup> with a deep  
 563 sequencing readout<sup>27</sup> to measure the interaction of gene overexpressions and  
 564 antimicrobial peptides on growth. To this aim, a pooled version of all *E. coli* ORF  
 565 overexpressing strain collection (ASKA collection) was grown in the absence and  
 566 presence of CAP18 and CP1, respectively, while mild overexpressions were induced

567 (for more details see Materials and Methods). Following approximately 12-15  
568 generations of logarithmic growth, next-generation sequencing was applied on the  
569 resulting plasmid pool to measure the relative abundance of each overexpression  
570 strain in the populations. Analogously to a transcriptome analysis, the mapped read  
571 count of each ORF report on the abundance in the pooled sample, but in this  
572 competition assay the read counts are proportional to the frequency of each strain in  
573 the population. A relative drop in the abundance of a certain overexpression strain in  
574 the peptide-treated sample (differential growth analysis) indicates that the  
575 overexpressed gene sensitizes specifically in the presence of the antimicrobial  
576 peptide. **b**, Measurement noise in the competition experiments for the entire dataset  
577 (n=3059 genes). Technical replicates were generated on the same day, started from  
578 the same inoculum and sequenced together. Biological replicates were generated  
579 independently and sequenced separately. The data shows the distribution of the read  
580 counts mapped onto *E. coli* ORFs following loglinear transformation, but before  
581 normalization (see Materials and Methods). Pearson correlations between the  
582 replicates are indicated in the upper left corners. **c**, Distribution of the normalized  
583 read counts in the absence (NT) and presence of CAP18 or CP1. Following data  
584 processing (see Material and Methods), the distributions of the relative read counts  
585 show a bimodal distribution. The lower and upper modes correspond to ORFs that  
586 are not present in the sample anymore due to slow growth (indicated by the fact that  
587 this mode is close to loglinear(0) read counts even before normalization) and those  
588 that grow unaffected by the overexpression (indicated by the fact that this mode is  
589 close to loglinear(1/n) read counts, where n is the number of strains in the  
590 competition), respectively.

591

592

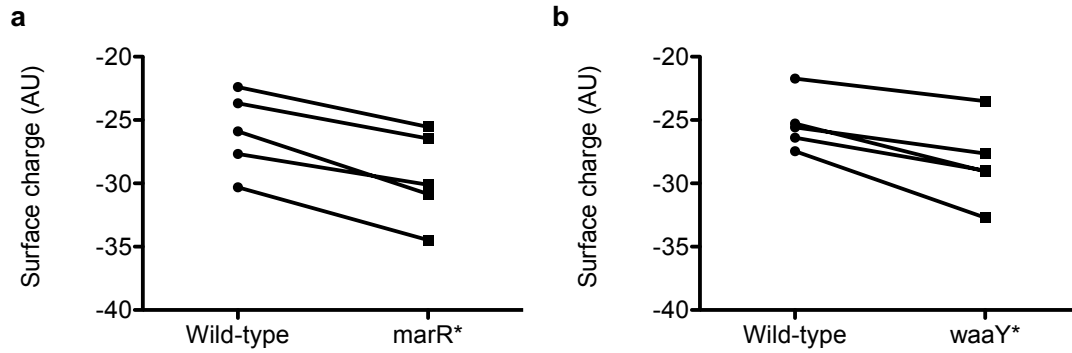

593

594 **Supplementary Figure 7 - Cellular surface charge (zeta potential) of**  
 595 **the *marR* single-mutant (*marR*\*) and the *waaY* overexpressing**  
 596 **strain (*waaY* plasmid)**

597 Zeta potential of both *marR* (a) mutant and *waaY* (b) overexpressing strains, and the  
 598 respective controls (see Materials and Methods). Both the *marR* mutant and the  
 599 *waaY* overexpressing strain have a significantly increased negative surface charge  
 600 (Two-sided paired t-tests  $p=0.0016$  and  $p=0.0081$ , respectively). Comparisons are  
 601 based on 5 biological and 8 technical replicates (i.e. each data point represents the  
 602 average of 8 technical replicates). AU, arbitrary units.

603

604



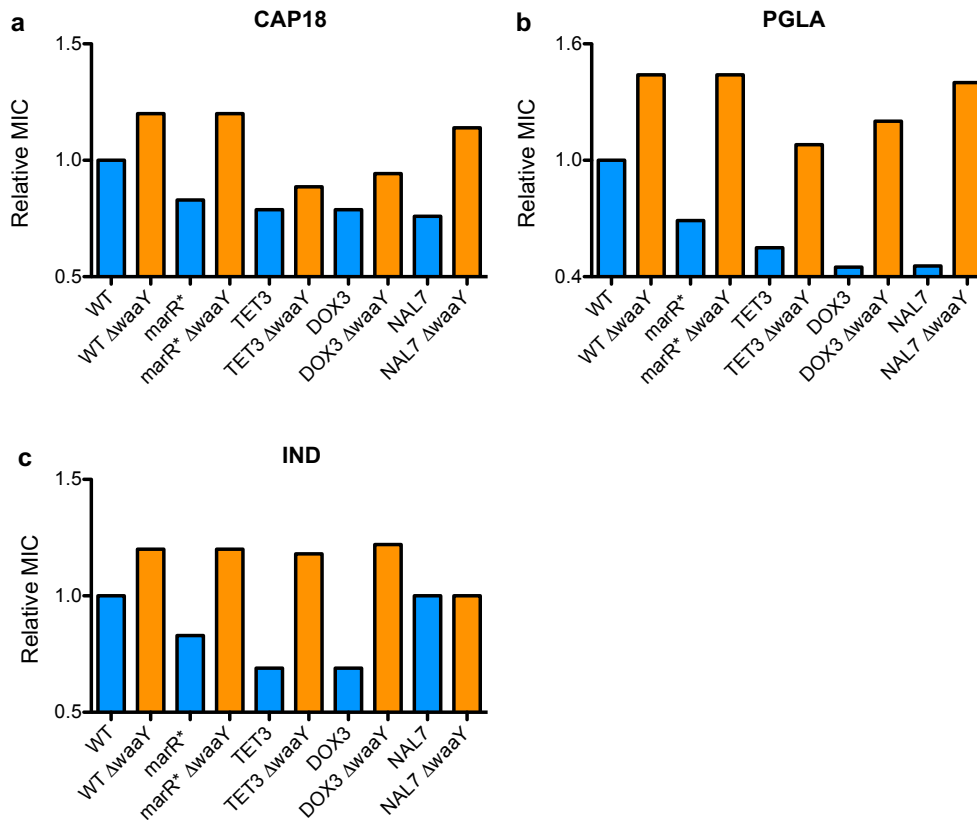

605

606 **Supplementary Figure 8 - Inactivation of *waaY* in *marR* mutant**  
 607 **strains leads to the loss of collateral sensitivity towards P3**  
 608 **peptides**

609 The *marR* Val84Glu mutant (*marR*\*) strain exhibits extensive collateral sensitivity to  
 610 P3 peptides, such as CAP18, IND and PGLA (Table 1). We hypothesized that this  
 611 mutation in the *marR* gene causes collateral sensitivity through upregulating the  
 612 WaaY kinase responsible for phosphorylation of the inner core of lipopolysaccharides  
 613 (LPS). To investigate the causal role of *waaY* in collateral sensitivity, we inactivated  
 614 this gene in the wild-type *E. coli* BW25113 (WT) background, in the *marR*\* mutant  
 615 and in three antibiotic-resistant strains that carry a mutation in *marR* (TET3, DOX3  
 616 and NAL7) by inserting of two consecutive premature stop codons at the 10<sup>th</sup> amino  
 617 acid position using pORTMAGE<sup>2</sup> (see Supplementary Method 4). Next, we measured  
 618 the minimum inhibitory concentration of both the original (blue) and the *waaY*-  
 619 inactivated ( $\Delta waaY$ , orange) strains towards P3 peptides, including CAP18 (a),  
 620 PGLA (b) and IND (c). In agreement with data presented in Table 1, we observed  
 621 collateral sensitivity of the *marR*\* mutant and the antibiotic-resistant strains towards  
 622 all three peptides, and no interaction of NAL7 strain towards IND. With the exception  
 623 of this last example, the inactivation of *waaY* in the *marR*\* mutant and in the

624 antibiotic-resistant strains not only led to the loss of collateral sensitivity, but in most  
625 cases also provided the same level of resistance as in the wild-type background.  
626 Please note that, with exception of TET3-CAP18, DOX3-CAP18 and NAL7-IND  
627 strain-peptide combinations, the extent of MIC increase in response to *waaY*  
628 inactivation was larger in the *marR*\* mutant and antibiotic-resistant strains than in the  
629 wild-type. Relative MIC was calculated relative to the MIC of the wild-type (WT) for  
630 each of the strains. Data in this figure is representative of 2 biological replicates.

631

632

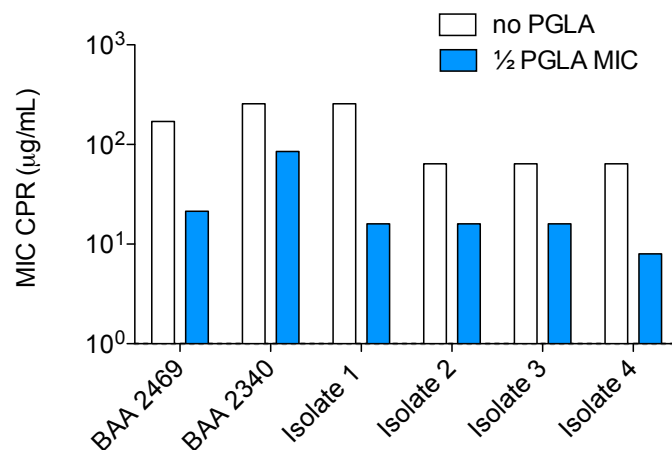

633  
634

635 **Supplementary Figure 9 - Impact of PGLA-ciprofloxacin**  
636 **cotreatment on resistance level in *Escherichia coli* clinical isolates**

637 Ciprofloxacin (CPR) minimum inhibitory concentration (MIC) is shown on the y-axis  
638 on a logarithmic scale. The 6 ciprofloxacin-resistant *Escherichia coli* clinical isolates  
639 include two ATCC antibiotic-resistant reference strains (BAA 2469 and BAA 2340)  
640 and four strains (isolates 1 to 4) from a local hospital provided by the Department of  
641 Clinical Microbiology, University of Szeged, Hungary. Strains 1 to 3 were isolated  
642 from urine samples, while Strain 4 was isolated from intraperitoneal puncture. CPR  
643 MICs were measured without (white) and with (blue) the presence of PGLA added at  
644 subinhibitory dosages (half of the MIC for each strain). We observed an  
645 approximately 4 to 16-fold decrease in ciprofloxacin MIC as a result of CPR-PGLA  
646 co-treatment in the six resistant strains. An antibiotic-sensitive reference strain  
647 (ATCC 25922) was also tested; the ciprofloxacin MIC of this strain remained the  
648 same: 0.008 µg/mL with or without PGLA. Data in this figure is representative of 2  
649 biological replicates.

650

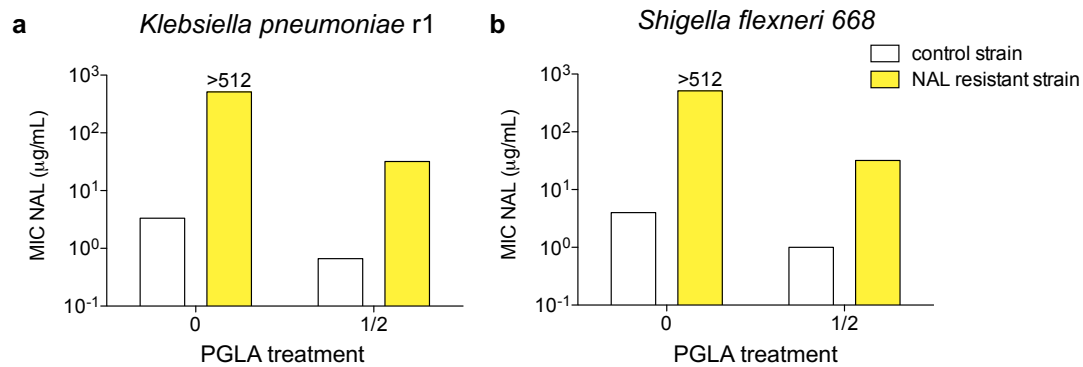

651

652 **Supplementary Figure 10 – Impact of PGLA–nalidixic acid co-**  
 653 **treatment on resistance level in *Klebsiella pneumoniae* and**  
 654 ***Shigella flexneri* strains**

655 To evaluate the efficiency of PGLA-Nalidixic acid co-treatment in pathogenic relatives  
 656 of *E. coli*, we tested how a subinhibitory concentration of PGLA affects the killing  
 657 efficiency of nalidixic acid (NAL) against NAL-resistant *Klebsiella pneumoniae* r1 (a)  
 658 and *Shigella flexneri* 668 strains (b), respectively. We observed an at least 16-fold  
 659 decrease in nalidixic acid MIC as a result of joint administration of PGLA in the  
 660 resistant strains and an approximately 4-fold decrease in the wild-type strains. As  
 661 previously (Supplementary Figure 9), PGLA was administered at subinhibitory  
 662 dosages. Nalidixic acid sensitive (white) and resistant (yellow) *Klebsiella pneumoniae*  
 663 r1 (a) and *Shigella flexneri* 668 (b) strains were provided by the Sommer lab (see  
 664 Materials and Methods). Nalidixic acid minimum inhibitory concentrations (MICs)  
 665 were measured without and with PGLA, at dosages around half of the peptide’s MIC  
 666 for each strain tested. “>512” indicates an MIC value above the indicated value (no  
 667 exact values, due to the solubility limit of NAL above this concentration). Data in this  
 668 figure is representative of 3 biological replicates.

669

670

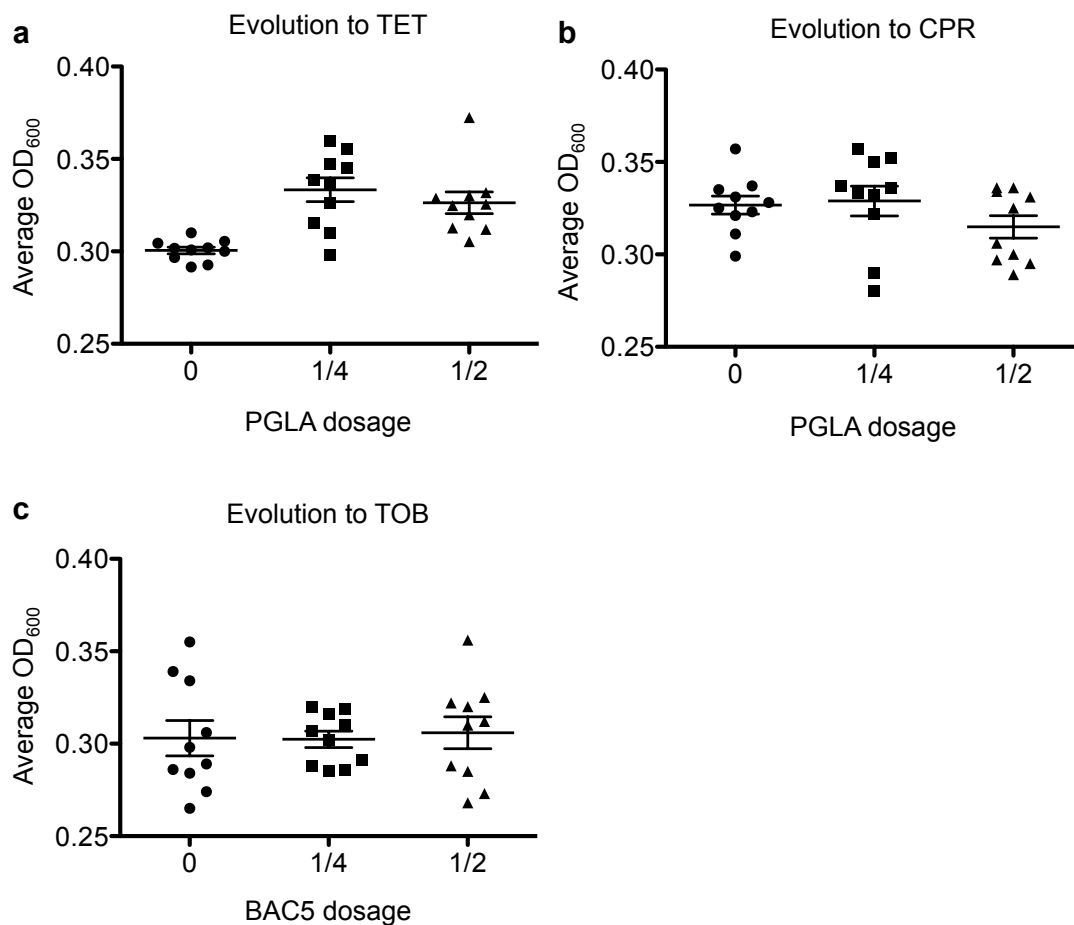

671

672 **Supplementary Figure 11 – Population size of evolving lines**  
673 **throughout the evolutionary experiment**

674 Population size was estimated by the optical density at 600nm (OD<sub>600</sub>) of each  
675 parallel-evolved lines prior to each transfer. Ten parallel lines were subjected to  
676 laboratory evolution per each treatment. *E. coli* BW25113 was adapted to (a)  
677 tetracycline (TET), (b) ciprofloxacin (CPR), or to (c) tobramycin (TOB) in the  
678 presence and absence of PGLA/BAC5. 1/2 and 1/4 of the wild-type PGLA/BAC5  
679 minimum inhibitory concentrations were employed. As a result of the protocol  
680 employed (see methods), the average OD<sub>600</sub> during the course of the laboratory  
681 evolution was consistently between 0.3 and 0.35. We failed to find any significant  
682 decrease in population size as a result of antimicrobial peptide co-treatment. Scatter  
683 plots (n=10) show the mean with whiskers showing the standard error of the mean.  
684

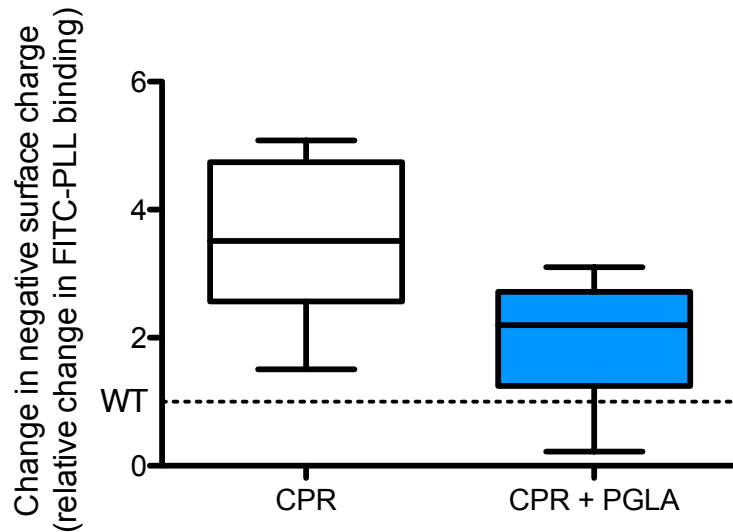

685

686 **Supplementary Figure 12 - Changes in cellular surface charge**  
 687 **upon adaptation to antibiotics in the absence and presence of a**  
 688 **subinhibitory dosage of PGLA**

689 We suspect that the efficiency of the antibiotic-PGLA co-treatment reflect elevated  
 690 costs of antibiotic resistance mutations under antibiotic-PGLA co-treatment. Because  
 691 CPR evolved lines show collateral sensitivity to PGLA, we speculate that such  
 692 mutations could cause changes in the bacterial membrane and therefore they would  
 693 be costly under CPR-PGLA co-treatment. As a preliminary test, we investigated the  
 694 changes in the cellular surface charge upon antibiotic adaptation in presence and  
 695 absence of PGLA. The purpose of this assay is to gain insight into the possible  
 696 mechanisms underlying the impact of PGLA-ciprofloxacin co-treatment on the *de*  
 697 *novo* evolution of ciprofloxacin resistance. In a nutshell, the surface charge of  
 698 laboratory-evolved bacteria was estimated using an established protocol<sup>25</sup> based on  
 699 FITC-labeled Poly-L-Lysine (FITC-PLL). Poly-L-lysine is a polycationic molecule  
 700 which is widely used to study the interaction between cationic peptides and charged  
 701 lipid bilayer membranes<sup>24</sup>. The binding assay was performed as described  
 702 previously<sup>25</sup>. The amount of bound FITC-PLL depends on the surface charge of the  
 703 bacterial cell. More bound FITC-PLL indicates a more negative surface charge<sup>24,25</sup>.  
 704 The extent of change in negative surface charge was approximated by normalizing  
 705 FITC-PLL binding values of each evolved line to that of the wild-type. We focused on  
 706 laboratory lines independently evolved under ciprofloxacin (CPR) mono-treatment or  
 707 CPR-PGLA co-treatment, respectively (see main text and methods for details).  
 708 Reassuringly, we found that lines evolved under CPR mono-treatment exhibit an

709 increased negative surface charge compared to that of the wild-type (two-sided one-  
710 sample t-test,  $p=0.0001$ ). Importantly, we found a significantly lower relative negative  
711 surface charge in lines evolved under CPR-PGLA co-treatment than those evolved  
712 under CPR mono-treatment (two-sided Mann-Whitney test,  $p=0.0040$ ). At the same  
713 time, CPR-PGLA co-treatment leads to a substantially decreased level of resistance  
714 to both drugs (Figure 6, main text). Boxplots present the median, first and third  
715 quartiles, with whiskers showing the 5th and 95th percentile.

716 We hypothesize that this pattern reflects elevated costs of certain CPR resistance  
717 mutations under CPR-PGLA co-treatment. For instance, we established that certain  
718 mutations in *marR* increase resistance to CPR, but at the same increase  
719 susceptibility to PGLA, putatively via altering the cellular surface charge. A full  
720 answer to this question will require detailed molecular and phenotypic  
721 characterization of laboratory-evolved bacteria.

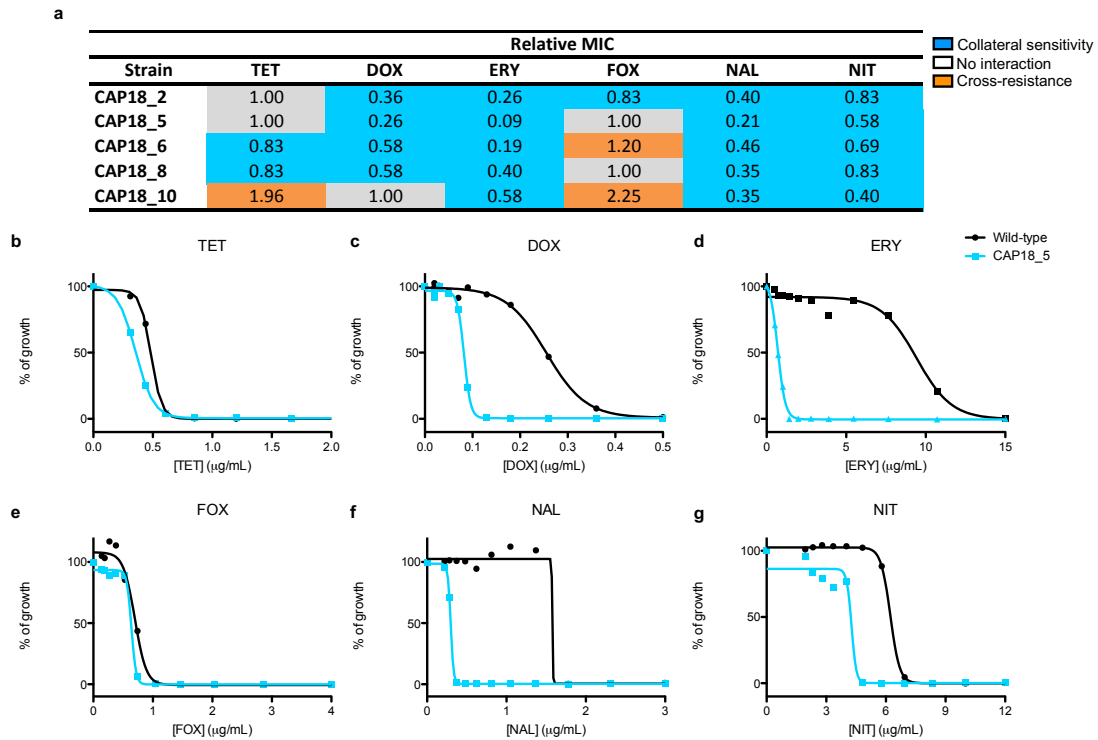

722

723 **Supplementary Figure 13 - Susceptibility of CAP18-resistant lines**  
 724 **towards a set of conventional antibiotics**

725 Susceptibility of five independently evolved CAP18-resistant strains was measured in  
 726 the form of minimum inhibitory concentration (MIC) towards six antibiotics, including  
 727 tetracycline (TET), doxycycline (DOX), erythromycin (ERY), ceftiofur (FOX), nalidixic  
 728 acid (NAL) and nitrofurantoin (NIT). Panel (a) shows the relative MIC values of all  
 729 five strains towards all six antibiotics compared to the wild-type. Relative MICs below  
 730 or above one indicate collateral sensitivity and cross-resistance, respectively. Panels  
 731 (b-g) show the detailed growth response curves for CAP18\_5, as an example.  
 732 Growth response curves are representative of 2 biological replicates, while relative  
 733 MIC data in panel (a) is based on at least 2 biological replicates.

734



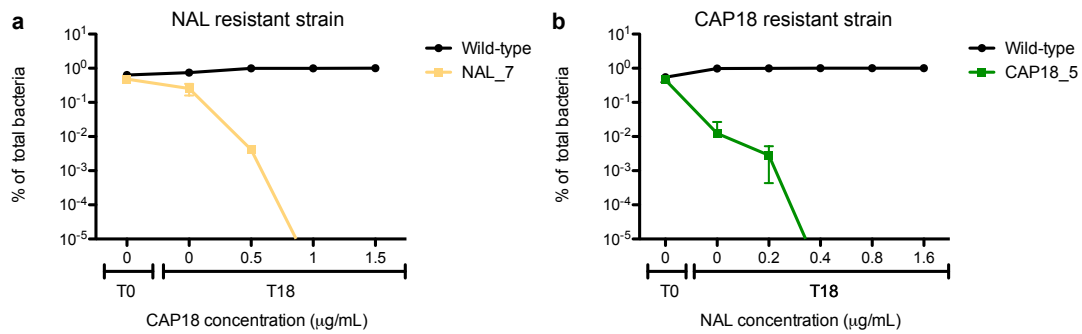

735

736 **Supplementary Figure 14 – Outcome of competition between drug-**  
 737 **resistant and wild-type strains.**

738 The figures show the ratio of resistant and wild-type bacteria competing in liquid  
 739 culture in the presence of different dosages of CAP18 (a) and naldixic acid (b),  
 740 respectively. At start (T0), the strains had equal frequencies (50-50%). After 18 hours  
 741 (T18), we observed a general decrease in the frequency of resistant bacteria,  
 742 demonstrating the existence of a concentration range where resistant bacteria can  
 743 be selectively eradicated. A relatively minor fitness cost of resistance was detected in  
 744 the absence of drug. Each data point shows the mean  $\pm$  standard error of 3 biological  
 745 replicates. Colony forming units (CFU) were counted on agar plates. For further  
 746 details, see Supplementary Materials and Methods section.

747



761 membrane-associated GO processes and with no stationary phase dependent  
762 expression. Many antibiotic-resistant strains are enriched in significantly up- or  
763 downregulated genes (fold change>2 or <0.5, FDR-corrected p-value<0.05, two-  
764 sided Fisher's exact test), associated with membrane-related functions. Significant  
765 enrichments (p<0.05) are marked with an asterisk (\*). Strains sensitive to a given  
766 peptide show significant upregulations in specific GO groups compared to non-  
767 sensitive strains (right heatmap, two-sided Student's t-test; for further details, see  
768 Supplementary Figure 5). Peptides with either too few or too many collateral  
769 sensitivity interactions (n<4 or n>21, respectively) were excluded from the statistical  
770 analysis based on sample size calculation with alpha=0.1, power=0.8, delta=2,  
771 SD=1, and are indicated with a minus sign (-). Sample size used in this analysis is  
772 provided in Supplementary Table 3. **b**, Upregulation of LPS-related genes with no  
773 stationary phase dependent expression sensitize to CAP18. CAP18-sensitive  
774 antibiotic-resistant strains (CS, n=12) have significantly higher expression levels of  
775 CAP18 sensitizing genes within the 'LPS biosynthetic process' GO category than  
776 non-sensitive strains (not CS, n=12) (p=0.003, two-sided Wilcoxon rank-sum test).  
777 Boxplots show the median, first and third quartiles, with whiskers showing the 5th  
778 and 95th percentile. Significant difference (p<0.01) is marked with asterisks (\*\*).

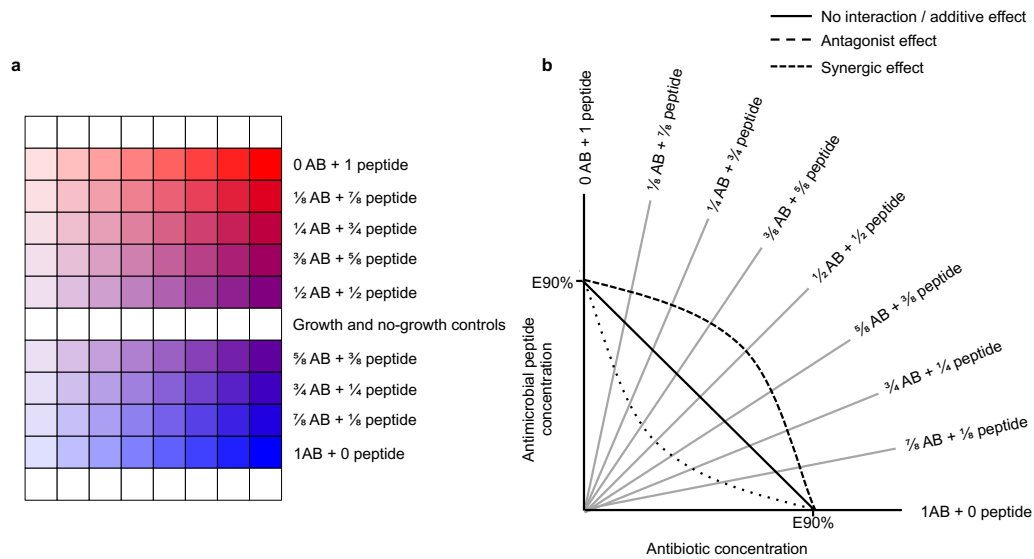

780 **Supplementary Figure 16 - Antibiotic-antimicrobial peptide**  
 781 **combination measurements: schematic representation of the plate**  
 782 **set up (a) and the combination assay (b).**

783 **a**, On each 96-well plate we probed the physiological interaction between one  
 784 antibiotic (AB, blue) and one antimicrobial peptide (red) as follows. We combined the  
 785 dilution series in 7 different antibiotic:peptide ratios. Thus, each plate contained 7  
 786 antibiotic:peptide ratio dilution series, dilution series of single agents, 4 bacteria-free  
 787 wells (no growth control) and 4 wells containing only medium without any drugs  
 788 (growth control). **b**, To calculate the combination index (CI) we first identified those  
 789 two concentration points for each antibiotic:peptide ratio where the inhibition of the  
 790 growth was 90% (EC90%). Then, by applying the Loewe additivity model to the  
 791 EC90% values of the single agents, we calculated the theoretical EC90% dosages  
 792 for each of the 7 antibiotic:peptide ratios. Geometrically, the theoretical EC90%  
 793 based on the Loewe model can be represented as a linear line between the EC90%  
 794 of the single agents in the two-dimensional linear concentration space. Deviation of  
 795 the shape of the lines connecting the experimentally measured EC90% from linearity  
 796 indicates either synergism (concave isoboles) or antagonism (convex isoboles).

797

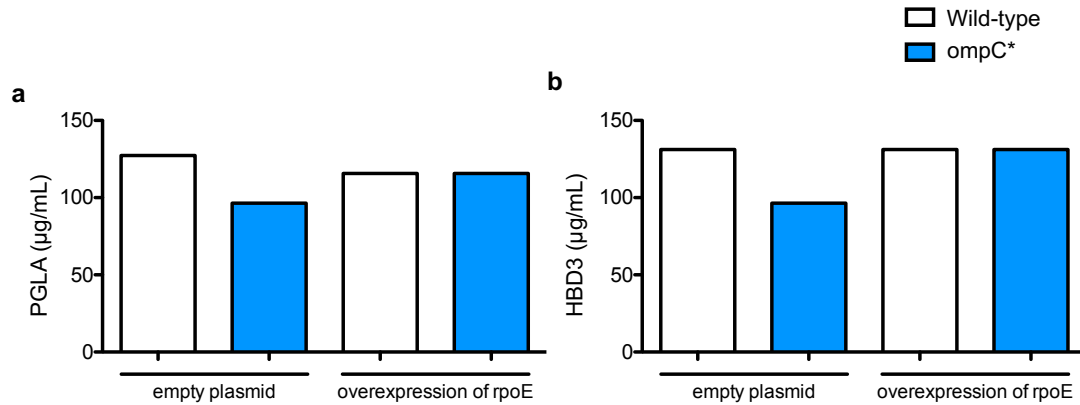

798

799 **Supplementary Figure 17 - Overexpression of *rpoE* sigma factor**  
 800 **eliminates collateral sensitivity of *ompC* loss-of function mutant**

801 Strains carrying either a plasmid overexpressing the *rpoE* or an empty plasmid were  
 802 established for both the wild-type and the *ompC* mutant strains (in all cases the  
 803 plasmid was maintained by adding 10 ug/ml chloramphenicol and induced by 50nM  
 804 IPTG). Minimum inhibitory concentration (MIC) was measured for PGLA (a) and  
 805 HBD3 (b), to both of which the *ompC* mutant exhibited substantial collateral  
 806 sensitivity. Data in this figure is representative of 3 biological replicates.

807

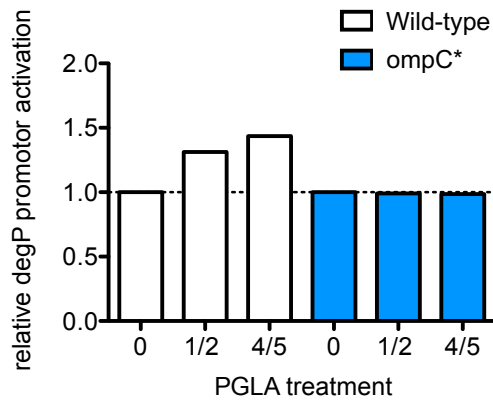

808

809 **Supplementary Figure 18 - Sublethal dosages of PGLA leads to**  
 810 ***degP* activation in the wild-type strain, but not in the *ompC* loss-of-**  
 811 **function mutant**

812 Both the wild-type strain and the *ompC* mutant were treated with either 50% (1/2) or  
 813 80% (4/5) of the PGLA peptide's minimum inhibitory concentration (MIC). Relative  
 814 promoter activity was calculated by normalizing the measured promoter activity of  
 815 each strain / condition to that of the untreated wild-type. Data in this figure is  
 816 representative of 2 biological replicates.

817

818  
819  
820  
821  
822  
823  
824  
825  
826  
827  
828  
829  
830  
831  
832  
833  
834  
835  
836  
837  
838  
839  
840  
841  
842  
843  
844  
845  
846  
847  
848  
849  
850  
851  
852  
853  
854

## References

- 1 Lázár, V. *et al.* Genome-wide analysis captures the determinants of the antibiotic cross-resistance interaction network. *Nat Commun* **5**, 4352, (2014).
- 2 Scocchi, M., Tossi, A. & Gennaro, R. Proline-rich antimicrobial peptides: converging to a non-lytic mechanism of action. *Cellular and Molecular Life Sciences* **68**, 2317-2330, (2011).
- 3 Pages, J.-M., James, C. E. & Winterhalter, M. The porin and the permeating antibiotic: a selective diffusion barrier in Gram-negative bacteria. *Nat Rev Micro* **6**, 893-903, (2008).
- 4 Fernández, L. & Hancock, R. E. W. Adaptive and Mutational Resistance: Role of Porins and Efflux Pumps in Drug Resistance. *Clinical Microbiology Reviews* **25**, 661-681, (2012).
- 5 Audrain, B. *et al.* Induction of the Cpx Envelope Stress Pathway Contributes to Escherichia coli Tolerance to Antimicrobial Peptides. *Applied and Environmental Microbiology* **79**, 7770-7779, (2013).
- 6 Mecsas, J., Rouviere, P. E., Erickson, J. W., Donohue, T. J. & Gross, C. A. The activity of sigma E, an Escherichia coli heat-inducible sigma-factor, is modulated by expression of outer membrane proteins. *Genes & Development* **7**, 2618-2628, (1993).
- 7 Mathur, J., Davis, B. M. & Waldor, M. K. Antimicrobial peptides activate the Vibrio cholerae  $\sigma$ E regulon through an OmpU-dependent signalling pathway. *Molecular Microbiology* **63**, 848-858, (2007).
- 8 Egler, M., Grosse, C., Grass, G. & Nies, D. H. Role of the Extracytoplasmic Function Protein Family Sigma Factor RpoE in Metal Resistance of Escherichia coli. *Journal of Bacteriology* **187**, 2297-2307, (2005).
- 9 Crouch, M.-L. *et al.* The alternative sigma factor  $\sigma$ E is required for resistance of Salmonella enterica serovar Typhimurium to anti-microbial peptides. *Molecular Microbiology* **56**, 789-799, (2005).
- 10 Ulvatne, H., Haukland, H. H., Samuelsen, Ø., Krämer, M. & Vorland, L. H. Proteases in Escherichia coli and Staphylococcus aureus confer reduced susceptibility to lactoferricin B. *Journal of Antimicrobial Chemotherapy* **50**, 461-467, (2002).
- 11 Weatherspoon-Griffin, N., Yang, D., Kong, W., Hua, Z. & Shi, Y. The CpxR/CpxA Two-component Regulatory System Up-regulates the Multidrug Resistance Cascade to Facilitate Escherichia coli Resistance to a Model Antimicrobial Peptide. *The Journal of Biological Chemistry* **289**, 32571-32582,

- 855 (2014).
- 856 12 Moffatt, J. H. *et al.* Colistin Resistance in *Acinetobacter baumannii* Is Mediated  
857 by Complete Loss of Lipopolysaccharide Production. *Antimicrobial Agents*  
858 *and Chemotherapy* **54**, 4971-4977, (2010).
- 859 13 Imamovic, L. & Sommer, M. O. Use of collateral sensitivity networks to design  
860 drug cycling protocols that avoid resistance development. *Sci Transl Med* **5**,  
861 204ra132, (2013).
- 862 14 Jiao, Y. J., Baym, M., Veres, A. & Kishony, R. Population diversity jeopardizes  
863 the efficacy of antibiotic cycling. *bioRxiv*, (2016).
- 864 15 Lázár, V. *et al.* Bacterial evolution of antibiotic hypersensitivity. *Molecular*  
865 *Systems Biology* **9**, 700-700, (2013).
- 866 16 Zaslaver, A. *et al.* A comprehensive library of fluorescent transcriptional  
867 reporters for *Escherichia coli*. *Nat Meth* **3**, 623-628, (2006).
- 868 17 Bódi, Z. *et al.* Phenotypic heterogeneity promotes adaptive evolution. *PLOS*  
869 *Biology* **15**, e2000644, (2017).
- 870 18 Suzuki, S., Horinouchi, T. & Furusawa, C. Prediction of antibiotic resistance by  
871 gene expression profiles. *Nature Communications* **5**, 5792, (2014).
- 872 19 Nyerges, Á. *et al.* A highly precise and portable genome engineering method  
873 allows comparison of mutational effects across bacterial species.  
874 *Proceedings of the National Academy of Sciences* **113**, 2502-2507, (2016).
- 875 20 Minogue, T. D. *et al.* Complete Genome Assembly of *Escherichia coli* ATCC  
876 25922, a Serotype O6 Reference Strain. *Genome Announcements* **2**, (2014).
- 877 21 Bonde, M. T. *et al.* MODEST: a web-based design tool for oligonucleotide-  
878 mediated genome engineering and recombineering. *Nucleic Acids Research*  
879 **42**, W408-W415, (2014).
- 880 22 Alves, C. S. *et al.* *Escherichia coli* cell surface perturbation and disruption  
881 induced by antimicrobial peptides BP100 and pepR. *J Biol Chem* **285**, 27536-  
882 27544, (2010).
- 883 23 Domingues, M. M., Santiago, P. S., Castanho, M. A. R. B. & Santos, N. C.  
884 What can light scattering spectroscopy do for membrane-active peptide  
885 studies? *Journal of Peptide Science* **14**, 394-400, (2008).
- 886 24 Rossetti, F. F. *et al.* Interaction of Poly(L-Lysine)-g-Poly(Ethylene Glycol) with  
887 Supported Phospholipid Bilayers. *Biophysical Journal* **87**, 1711-1721, (2004).
- 888 25 Peschel, A. *et al.* Inactivation of the *dlt* Operon in *Staphylococcus aureus*  
889 Confers Sensitivity to Defensins, Protegrins, and Other Antimicrobial  
890 Peptides. *Journal of Biological Chemistry* **274**, 8405-8410, (1999).
- 891 26 Pierce, S. E., Davis, R. W., Nislow, C. & Giaever, G. Genome-wide analysis of



892 barcoded *Saccharomyces cerevisiae* gene-deletion mutants in pooled  
893 cultures. *Nat. Protocols* **2**, 2958-2974, (2007).

894 27 Robinson, D. G., Chen, W., Storey, J. D. & Gresham, D. Design and Analysis  
895 of Bar-seq Experiments. *G3: Genes|Genomes|Genetics* **4**, 11-18, (2014).

896 28 Chang, D. E., Smalley, D. J. & Conway, T. Gene expression profiling of  
897 *Escherichia coli* growth transitions: an expanded stringent response model.  
898 *Molecular Microbiology* **45**, 289-306, (2002).

899 29 Tjaden, B. *et al.* Transcriptome analysis of *Escherichia coli* using high-density  
900 oligonucleotide probe arrays. *Nucleic Acids Research* **30**, 3732-3738, (2002).

901 30 Dong, T. & Schellhorn, H. E. Control of RpoS in global gene expression of  
902 *Escherichia coli* in minimal media. *Molecular Genetics and Genomics* **281**,  
903 19-33, (2009).

904
